# Supplementary material for: Anoxia-induced hippocampal LTP is regeneratively produced by glutamate and nitric oxide from the neuro-glial-endothelial axis
Source: PubMed Central journal article supplement — iScience. 2024 Mar 16;27(4):109515. doi: 10.1016/j.isci.2024.109515 (PMC11000013; doi:10.1016/j.isci.2024.109515), 2024-03-16
Supplement: mmc1.pdf [file mmc1.pdf]

iScience, Volume 27

## **Supplemental information**

**Anoxia-induced hippocampal LTP is regeneratively  
produced by glutamate and nitric oxide  
from the neuro-glial-endothelial axis**

**Han-Ying Wang, Hiroshi Takagi, Patrick N. Stoney, Anai Echeverria, Bernd Kuhn, Kuei-Sen Hsu, and Tomoyuki Takahashi**

## SUPPLEMENTAL INFORMANTION

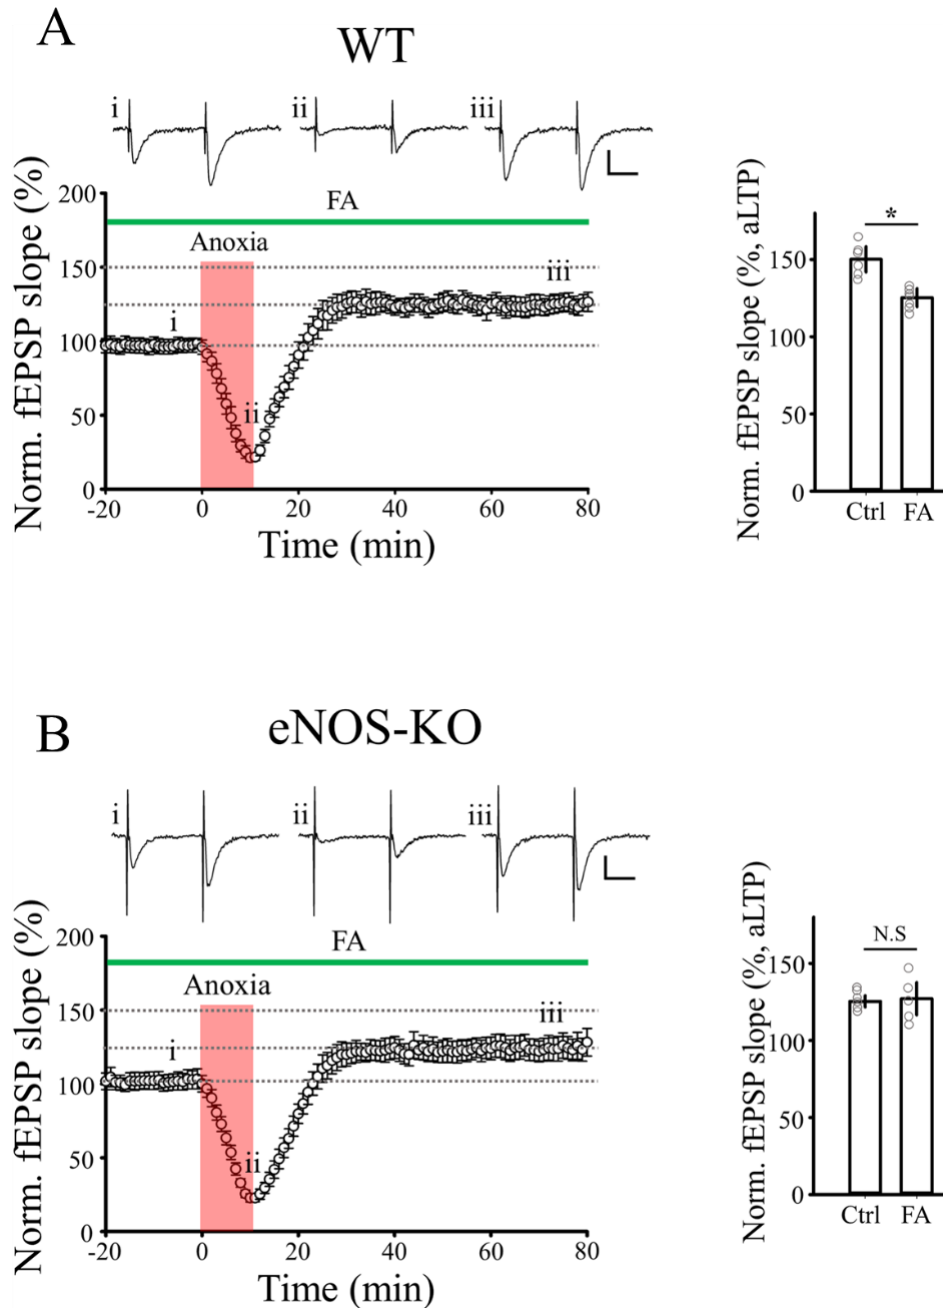

**Fig S1. FA selectively blocks eNOS-dependent LTP. Related to Figure 5.**

(A) In slices from WT mice, FA (10 mM) reduced aLTP of fEPSPs to  $125.3 \pm 6\%$  ( $n = 7$ ) in comparison to controls ( $150 \pm 8\%$ ,  $n = 7$ ,  $p < 0.05$ , Student's *t*-test). (B) FA had no effect on aLTP in slices from eNOS-KO mice (Ctrl  $125 \pm 4\%$ ,  $n = 6$ , FA  $127 \pm 10\%$ ,  $n = 5$ , Student's *t*-test). \* $p < 0.05$ , N.S, no significance. Bar graphs (A, B) indicate aLTP magnitude in the presence of FA and control (contr) in the absence of FA. Scale bars: 0.2 mV, 20 ms.

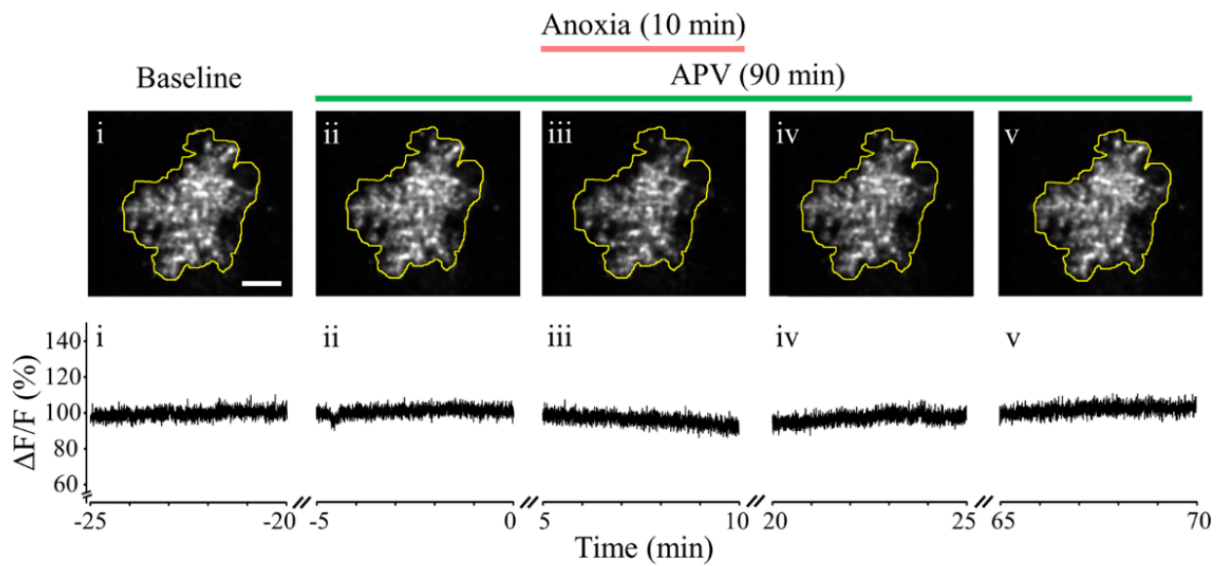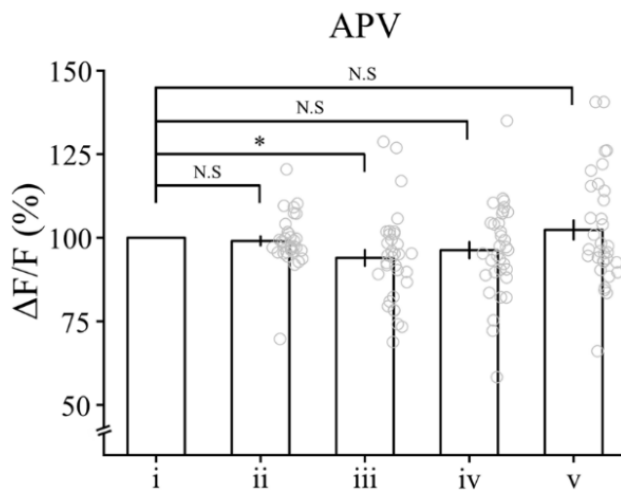

**Fig S2. APV blocks anoxia-induced Ca<sup>2+</sup> elevation in astrocytes. Related to Figure 6.**

Two-photon Ca<sup>2+</sup> imaging of GCaMP6f-expressing astrocytes. Bath-application of APV alone (100 μM for 90 min from 20 min before anoxia) had no effect on the astrocytic Ca<sup>2+</sup> signal (ii). Anoxic insult (10 min from time 0) caused a transient reduction of Ca<sup>2+</sup> signal (iii), but it recovered to the baseline within 10 min (iv) without showing Ca<sup>2+</sup> signal potentiation (v) in the presence of APV. Bar graphs for astrocytic Ca<sup>2+</sup> signal quantification in APV application experiments. APV significantly reduced astrocytic Ca<sup>2+</sup> signal after anoxia (iii,  $91.41 \pm 2.2\%$ , 11 slices,  $n = 33$ , one-way repeated-measures ANOVA:  $F_{(4, 160)} = 9.95$ ) with no potentiation thereafter (iv, see below). \* $p < 0.05$ , N.S, not significance. Ca<sup>2+</sup> signals from 1-3 astrocytes are simultaneously monitored and quantified.
